# Supplementary material for: Molecular Investigation of Recent Canine Parvovirus-2 (CPV-2) in Italy Revealed Distinct Clustering
Source: MDPI journal article supplement (doi:10.3390/v14050917), 2022-04-28
Supplement: s1 [file s1]

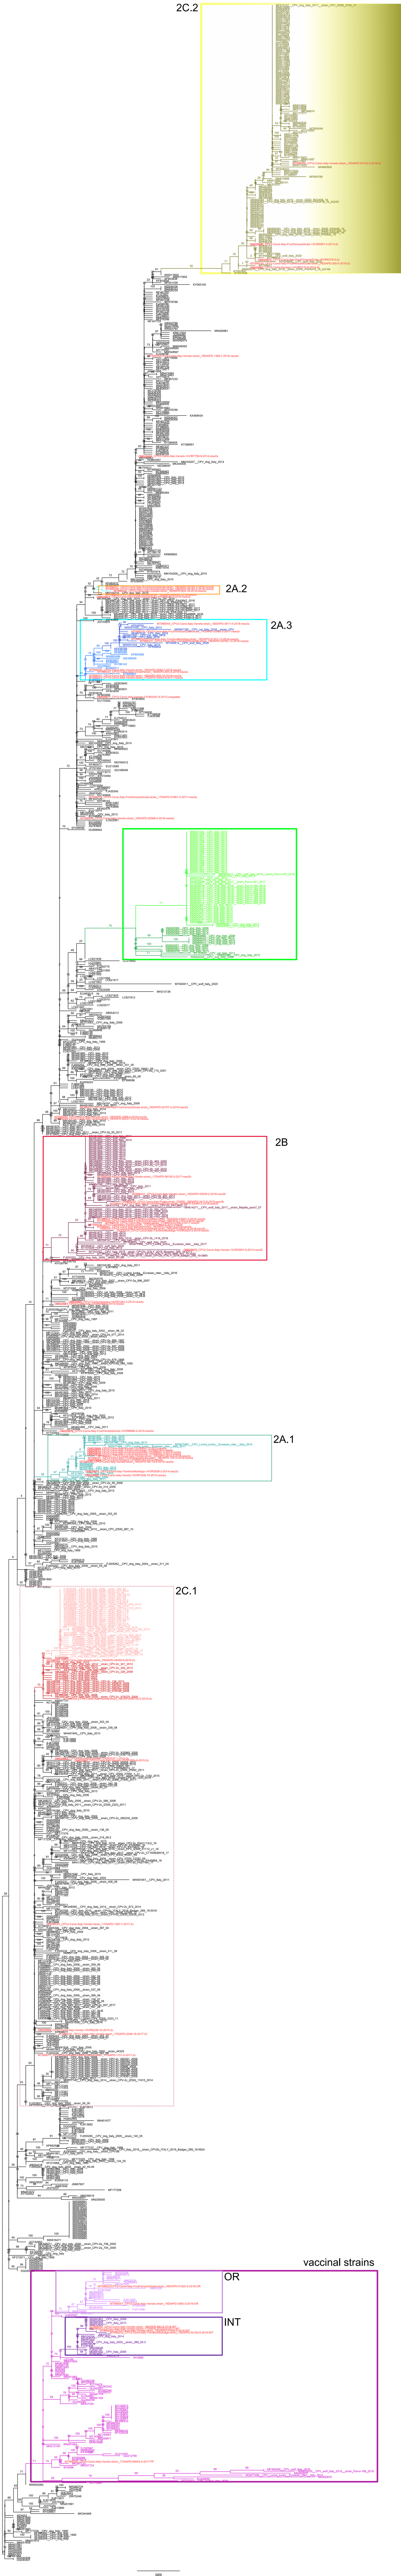

2A.3

1

INT



**Figure S1.** Phylogenetic tree of the VP2 nucleotide region of CPV-2 identified in the present study (highlighted in red) and similar CPV-2 strains available in GenBank. In rectangular boxes are reported eight monophyletic groups containing the majority of the IZSVe CPV-2 strains.
